# Supplementary material
Source: bioRxiv or medRxiv preprint supplement (http://medrxiv.stage.highwire.org/highwire/filestream/98114/field_highwire_adjunct_files/0/2020.09.23.20200519-1.pdf)
Supplement: Supplementary file [file 2020.09.23.20200519-1.pdf]

  
**INSTITUTIONAL ETHICS COMMITTEE**  
**CALCUTTA NATIONAL MEDICAL COLLEGE**  
 32, GORA CHAND ROAD, KOLKATA - 700 014

---

NO: \_\_\_\_\_ DATE: 8.12.16

\* Chairperson :  
 Prof. Subhasmita Chakraborty,  
 Ex-Principal, CNMC  
 \* Co-Chairperson :  
 Dr. D.N. Ghoshal,  
 HOD, Comm Med, CNMC  
 \* General Members :  
 1. Basic Medical Scientists :  
 Prop. P.S. Choudhury,  
 MDV, CNMC & H  
 Prof. Dipankar Guha Roy,  
 Prof & HOD, FIM, CNMC  
 Prof. Debajit Dasgupta,  
 Prof & HOD, Pharmacology, CNMC  
 Dr. A. Bhattacharya,  
 Comm Med, CNMC  
 2. Clinicians :  
 Prof. Manojree Roy,  
 Principal, CNMC  
 Prof. D. Roy,  
 Professor General Surgery, CNMC  
 Prof. A. Biswas,  
 HOD, Obst & Gynaec, CNMC  
 Prof. P. P. Mukherjee,  
 General Medicine, CNMC Dean of  
 Students Affairs  
 3. Legal Expert :  
 Smt. Abha Roy,  
 Advocate, Kolkata High Court.  
 4. Social Scientists :  
 Prof. Subhasmita Ghoshal,  
 Ex-Principal Moulana Azad College  
 5. Philosopher :  
 Swami Akashananda  
 (Ramakrishna Mission Vidyapeeth)  
 6. Community Representative  
 Sri Subhankar Saha

**CERTIFICATE OF APPROVAL**

This is to certify that research proposal titled:

*Study to assess association  
of C-Reactive protein with  
nephropathy in people living  
with Type 2 Diabetes Mellitus*

Submitted by *Dr. Kaushik Mondal*  
*1st year PGT, General Medicine*  
*Ward 7/12/16*

Has been reviewed by the Institutional Ethics Committee,  
Calcutta National Medical College, Kolkata and approved for  
continuation abiding all the institutional rules and regulations.

  
 Chairperson  
 Institutional Ethics Committee  
 Calcutta National Medical College, Kolkata

Ethical Approval from Ethics board of Calcutta National Medical College
